# Supplementary material
Source: PubMed Central journal article supplement (PMC9152982)
Supplement: NIHMS1794933-supplement-1.pdf [file NIHMS1794933-supplement-1.pdf]

**APPENDIX**

**Table A1. Working list of diagnosis codes to identify potential Transfusion Related Acute Lung Injury (TRALI) cases**

| ICD-9-CM Code* | Definition                                                                   |
|----------------|------------------------------------------------------------------------------|
| 518.7          | Transfusion-related acute lung injury                                        |
| 518.81         | Acute respiratory failure                                                    |
| 518.82         | Other pulmonary insufficiency, not elsewhere classified code in any position |
| 999.80         | Other infusion and transfusion reaction                                      |
| 999.89         | Other transfusion reaction                                                   |
| E934.7         | Natural blood and blood products causing adverse effects in therapeutic use  |

\* *International Classification of Diseases, ninth revision, Clinical Modification*

**Table A2. Electronic criteria to identify potential Transfusion Related Acute Lung Injury (TRALI) cases**

| Criteria                                                  | ICD-9-CM Code(s)                                                                                                                           |
|-----------------------------------------------------------|--------------------------------------------------------------------------------------------------------------------------------------------|
| Criterion A<br>(potential-TRALI <sub>A</sub> )            | TRALI, ICD-9-CM* code in any position (518.7)                                                                                              |
| Criterion B<br>(potential-TRALI <sub>B</sub> )            | Acute respiratory failure ICD-9-CM* code in any position (518.81), WITH code for a blood transfusion reaction (999.80 or 999.89 or E934.7) |
| Criterion C<br>(potential-TRALI <sub>C</sub> )            | Other pulmonary insufficiency ICD-9-CM code (518.82), WITH code for a blood transfusion reaction (999.80 or 999.89 or E934.7)              |
| Any TRALI Criteria<br>(potential-TRALI <sub>A,B,C</sub> ) | Criteria A, and/or B, and/or C listed above                                                                                                |

\* *International Classification of Diseases, ninth revision, Clinical Modification*

**Table A3. International Classification of Diseases, ninth revision, Clinical Modification (ICD-9-CM) and Healthcare Common Procedure Coding System (HCPCS) procedure codes for mechanical ventilation**

| ICD-9-CM Code | Code Type | Definition                                                                    |
|---------------|-----------|-------------------------------------------------------------------------------|
| 93.90         | ICD-9-CM  | Non-invasive mechanical ventilation                                           |
| 96.0          | ICD-9-CM  | Non-operative intubation of gastrointestinal and respiratory tracts           |
| 96.01         | ICD-9-CM  | Insertion of nasopharyngeal airway                                            |
| 96.02         | ICD-9-CM  | Insertion of oropharyngeal airway                                             |
| 96.03         | ICD-9-CM  | Insertion of esophageal obturator airway                                      |
| 96.04         | ICD-9-CM  | Insertion of endotracheal tube                                                |
| 96.05         | ICD-9-CM  | Other intubation of respiratory tract                                         |
| 96.7          | ICD-9-CM  | Other continuous invasive mechanical ventilation                              |
| 96.70         | ICD-9-CM  | Continuous invasive mechanical ventilation of unspecified duration            |
| 96.71         | ICD-9-CM  | Continuous invasive mechanical ventilation for less than 96 consecutive hours |
| 96.72         | ICD-9-CM  | Continuous invasive mechanical ventilation for 96 consecutive hours or more   |
| A7030         | HCPCS     | Full face mask used with positive airway pressure device, each                |
